# Supplementary material for: Interventions Effective in Decreasing Burden in Caregivers of Persons with Dementia: A Meta-Analysis
Source: MDPI journal article supplement (doi:10.3390/nursrep14020071), 2024-04-15
Supplement: s1 [file s1]

Interventions effective in decreasing burden in caregivers of persons with dementia:  
A meta-analysis.

Francisco José Rodríguez Alcazar<sup>1\*</sup>, Raúl Juárez-Vela<sup>2</sup>, Juan Luis Sánchez González<sup>3</sup> y  
Javier Martín-Vallejo<sup>4</sup>

<sup>1</sup> MPhil, Regional Health Management of Castilla y León, Spain; <https://orcid.org/0000-0002-7433-7816> ; [obifran@hotmail.com](mailto:obifran@hotmail.com)

<sup>2</sup> PhD, Group of Research in Care (GRUPAC), Faculty of Health Sciences, University of La Rioja, Logroño, Spain; <https://orcid.org/0000-0003-3597-2048>

<sup>3</sup> PhD, Department of Physiotherapy, Faculty of Nursing and Physiotherapy, University of Salamanca, Spain; <https://orcid.org/0000-0002-4791-6513>

<sup>4</sup> PhD, Department of Statistics, Faculty of Medicine, University of Salamanca, Spain; <https://orcid.org/0000-0003-3962-7356>

\* Correspondence: [juanluissanchez@usal.es](mailto:juanluissanchez@usal.es)

## Table of contents

|                                                                                  |           |
|----------------------------------------------------------------------------------|-----------|
| <i>Supplementary Table S1. Respite care studies.</i>                             | <i>3</i>  |
| <i>Supplementary Table S2. Support group studies.</i>                            | <i>4</i>  |
| <i>Supplementary Table S3. Individual information studies.</i>                   | <i>5</i>  |
| <i>Supplementary Table S4. Workshop studies.</i>                                 | <i>5</i>  |
| <i>Supplementary Table S5. Group therapy studies.</i>                            | <i>6</i>  |
| <i>Supplementary Table S6. Individual therapy studies.</i>                       | <i>7</i>  |
| <i>Supplementary Table S7. Jadad scale quality studies.</i>                      | <i>8</i>  |
| <i>Supplementary Table S8. Delphi list quality studies.</i>                      | <i>11</i> |
| <i>Supplementary Table S9. Forbes scale quality studies.</i>                     | <i>13</i> |
| <i>Supplementary Table S10. Risk of bias (ROB) 2.0</i>                           | <i>15</i> |
| <i>Supplementary Table S11. The PRISMA Checklist.</i>                            | <i>19</i> |
| <i>Supplementary Figure S1. Heterogeneity evolution when excluding articles.</i> | <i>23</i> |
| <i>Supplementary Figure S2. Heterogeneity evolution when excluding articles.</i> | <i>24</i> |

## Supplementary Table S1. Respite care studies.

| Author                | NCDs            | Scale              | Intervention time | Intervention end (weeks) | Drop out  | Nurse | Country | Relationship | Sex  | Education mean (SD) | Age (SD)      | Income | Trainer   | Control group <sup>c</sup> | Final control group <sup>d</sup> |
|-----------------------|-----------------|--------------------|-------------------|--------------------------|-----------|-------|---------|--------------|------|---------------------|---------------|--------|-----------|----------------------------|----------------------------------|
| Quayhagen, 2000 [33]  | Combined        | (BI) <sup>a</sup>  | 8                 | 12                       | UNDEFINED | YES   | USA     | SPOUSE       | 0,63 | 14,42 (0,3)         | 71,83 (0,8)   | NO     | COMBINED  | WL                         | SINGLE                           |
| Baumgarten, 2002 [56] | Other dementias | (CBI) <sup>b</sup> | 12                | 12                       | 15%       | NO    | FRANCE  | COMBINED     | 0,72 | NO                  | 56,35 (15,84) | NO     | UNDEFINED | WL                         | ALL                              |
| Mosello, 2008 [57]    | Other dementias | (CBI) <sup>a</sup> | 8                 | 8                        | 5%        | YES   | ITALY   | COMBINED     | 0,65 | 7,7 (0,7)           | 57 (2)        | NO     | COMBINED  | CG(UC)                     | UNDEFINED                        |

Note. <sup>a</sup> Partial data. <sup>b</sup> Global data. <sup>c</sup> Control group without intervention (CG), Control group with alternative intervention (CG-AI), Control group with usual alternative intervention (CG-UC), Waiting list without intervention (WL), Waiting list with alternative intervention (WL-AI), Waiting list with usual alternative intervention (WL-UC). <sup>d</sup> At the end of the study, the control group may or may not receive the new intervention. (CBI)-Caregiver Burden Index; (BI)-Memory and Behavior Problem Checklist;(RMBPC)-Revised Memory and Behavior Problem Checklist;(MBPC)-The Memory and Behavior Problems Checklist;(CSS)-Caregiver Strain Scale;(ICS)-Impact of Caregiver Scale.

Supplementary Table S2. Support group studies.

| Author             | NCDs            | Scale                | Intervention time | Intervention end (weeks) | Drop out | Nurse | Country | Relationship | Sex  | Education mean (SD) | Age (SD)      | Income   | Trainer       | Control group <sup>c</sup> | Final control group <sup>d</sup> |
|--------------------|-----------------|----------------------|-------------------|--------------------------|----------|-------|---------|--------------|------|---------------------|---------------|----------|---------------|----------------------------|----------------------------------|
| Zarit, 1987 [45]   | Combined        | (BI) <sup>b</sup>    | 8                 | 8                        | 35%      | NO    | USA     | COMBINED     | 0,63 | 14,38 (2,69)        | 62 (12,75)    | NO       | PSYCHOLOGIST  | WL                         | SINGLE                           |
| Hebert, 1994 [58]  | Combined        | (BI) <sup>b</sup>    | 8                 | 8                        | 27%      | YES   | CANADA  | SPOUSE       | 0,63 | 9,76 (1,56)         | 61,07 (13,27) | NO       | NURSE         | CG(UC)                     | UNDEFINED                        |
| Yordi, 1994 [59]   | Alzheimer       | (BI) <sup>a</sup>    | 36                | 36                       | 64%      | NO    | USA     | COMBINED     | 0,6  | NO                  | 63 (14,29)    | NO       | UNDEFINED     | CG(UC)                     | UNDEFINED                        |
| Teri, 1997 [32]    | Combined        | (BI) <sup>a</sup>    | 9                 | 9                        | 14%      | NO    | USA     | COMBINED     | 0,69 | 14,2 (2,7)          | 66,9 (11)     | NO       | THERAPIST     | CG(UC); WL                 | UNDEFINED                        |
| Roth, 2005 [60]    | Alzheimer       | (MBPC) <sup>b</sup>  | 52                | 52                       | 23%      | NO    | USA     | SPOUSE       | 0,58 | NO                  | 71,07 (9,08)  | NO       | SOCIAL WORKER | CG(UC)                     | UNDEFINED                        |
| Chien, 2008 [61]   | Combined        | (CBI) <sup>b</sup>   | 24                | 52                       | 3%       | YES   | CHINA   | COMBINED     | 0,64 | 0,68 (NO)           | 43,9 (9,2)    | \$18.456 | COMBINED      | CG(UC)                     | UNDEFINED                        |
| Logsdon, 2011 [62] | Other dementias | (RMBPC) <sup>a</sup> | 9                 | 9                        | 4%       | NO    | USA     | COMBINED     | 0,57 | NO                  | 67,94 (13,22) | NO       | FACILITATOR   | WL                         | ALL                              |

Note. <sup>a</sup> Partial data. <sup>b</sup> Global data. <sup>c</sup> Control group without intervention (CG), Control group with alternative intervention (CG-AI), Control group with usual alternative intervention (CG-UC), Waiting list without intervention (WL), Waiting list with alternative intervention (WL-AI), Waiting list with usual alternative intervention (WL-UC). <sup>d</sup> At the end of the study, the control group may or may not receive the new intervention. (CBI)-Caregiver Burden Index; (BI)-Memory and Behavior Problem Checklist;(RMBPC)-Revised Memory and Behavior Problem Checklist;(MBPC)-The Memory and Behavior Problems Checklist;(CSS)-Caregiver Strain Scale;(ICS)-Impact of Caregiver Scale.

## Supplementary Table S3. Individual information studies.

| Author               | NCDs            | Scale                | Intervention time | Intervention end (weeks) | Drop out | Nurse | Country | Relationship | Sex  | Education mean (SD) | Age (SD)      | Income  | Trainer      | Control group <sup>c</sup> | Final control group <sup>d</sup> |
|----------------------|-----------------|----------------------|-------------------|--------------------------|----------|-------|---------|--------------|------|---------------------|---------------|---------|--------------|----------------------------|----------------------------------|
| McCurry, 2005 [28]   | Alzheimer       | (RMBPC) <sup>a</sup> | 8                 | 24                       | 36%      | NO    | USA     | COMBINED     | 0,72 | 14,96 (2,47)        | 63,28 (15,83) | NO      | UNDEFINED    | CG(AI)                     | UNDEFINED                        |
| Dias, 2008 [29]      | Other dementias | (BI) <sup>b</sup>    | 24                | 24                       | 27%      | NO    | INDIA   | COMBINED     | 0,87 | NO                  | 54,48 (14,98) | \$1.485 | PSYCHIATRIST | WL(AI)                     | UNDEFINED                        |
| Gavrilova, 2009 [30] | Alzheimer       | (BI) <sup>b</sup>    | 5                 | 24                       | 12%      | NO    | RUSSIA  | COMBINED     | 0,73 | NO                  | 59,34 (15,54) | NO      | UNDEFINED    | WL(UC)                     | UNDEFINED                        |

Note. <sup>a</sup> Partial data. <sup>b</sup> Global data. <sup>c</sup> Control group without intervention (CG), Control group with alternative intervention (CG-AI), Control group with usual alternative intervention (CG-UC), Waiting list without intervention (WL), Waiting list with alternative intervention (WL-AI), Waiting list with usual alternative intervention (WL-UC). <sup>d</sup> At the end of the study, the control group may or may not receive the new intervention. (CBI)-Caregiver Burden Index; (BI)-Memory and Behavior Problem Checklist;(RMBPC)-Revised Memory and Behavior Problem Checklist;(MBPC)-The Memory and Behavior Problems Checklist;(CSS)-Caregiver Strain Scale;(ICS)-Impact of Caregiver Scale.

## Supplementary Table S4. Workshop studies.

| Author                        | NCDs      | Scale                                  | Intervention time | Intervention end (weeks) | Drop out | Nurse | Country | Relationship | Sex  | Education mean (SD) | Age (SD)     | Income | Trainer   | Control group <sup>c</sup> | Final control group <sup>d</sup> |
|-------------------------------|-----------|----------------------------------------|-------------------|--------------------------|----------|-------|---------|--------------|------|---------------------|--------------|--------|-----------|----------------------------|----------------------------------|
| Ostwald, 1999 [63]            | Combined  | (RMBPC) <sup>a</sup> (BI) <sup>b</sup> | 7                 | 20                       | 20%      | YES   | USA     | NO           | 0,67 | NO                  | 64,86 (13,6) | NO     | COMBINED  | WL                         | ALL                              |
| Gallagher-thompson, 2000 [64] | Combined  | (ICS) <sup>a</sup>                     | 10                | 12                       | 24%      | YES   | USA     | COMBINED     | 0,83 | 14,4 (2,1)          | 59,7 (10,7)  | NO     | COMBINED  | WL                         | SINGLE                           |
| Bourgeois, 2002 [20]          | Alzheimer | (CSS) <sup>b</sup>                     | 13                | 24                       | 33%      | NO    | USA     | SPOUSE       | 0,54 | NO                  | 72,62 (6,56) | NO     | THERAPIST | CG(UC)                     | NO DEFINE                        |

Note. <sup>a</sup> Partial data. <sup>b</sup> Global data. <sup>c</sup> Control group without intervention (CG), Control group with alternative intervention (CG-AI), Control group with usual alternative intervention (CG-UC), Waiting list without intervention (WL), Waiting list with alternative intervention (WL-AI), Waiting list with usual alternative intervention (WL-UC). <sup>d</sup> At the end of the study, the control group may or may not receive the new intervention. (CBI)-Caregiver Burden Index; (BI)-Memory and Behavior Problem Checklist;(RMBPC)-Revised Memory and Behavior Problem Checklist;(MBPC)-The Memory and Behavior Problems Checklist;(CSS)-Caregiver Strain Scale;(ICS)-Impact of Caregiver Scale.

## Supplementary Table S5. Group therapy studies.

| Author                   | NCDs            | Scale                                     | Intervention time | Intervention end (weeks) | Drop out | Nurse | Country | Relationship | Sex  | Education mean (SD) | Age (SD)      | Income | Trainer       | Control group <sup>c</sup> | Final control group <sup>d</sup> |
|--------------------------|-----------------|-------------------------------------------|-------------------|--------------------------|----------|-------|---------|--------------|------|---------------------|---------------|--------|---------------|----------------------------|----------------------------------|
| Zarit, 1987 [45]         | Combined        | (BI) <sup>b</sup>                         | 8                 | 8                        | 35%      | NO    | USA     | COMBINED     | 0,63 | 14,38(2,69)         | 62 (12,75)    | NO     | PSYCHOLOGIST  | WL                         | SINGLE                           |
| Schwiebert, 1994 [46]    | Combined        | (CBI) <sup>a</sup>                        | 4                 | 4                        | 27%      | NO    | USA     | CHILDREN     | 0,86 | NO                  | 63,5 (NO)     | NO     | PSYCHOLOGIST  | WL                         | ALL                              |
| Quayhagen, 2000 [33]     | Combined        | (BI) <sup>a</sup>                         | 8                 | 8                        | NO       | YES   | USA     | SPOUSE       | 0,63 | 14,42 (0,3)         | 71,83 (0,8)   | NO     | COMBINED      | WL                         | SINGLE                           |
| Hebert, 2003 [47]        | Combined        | (BI) <sup>b</sup><br>(RMBPC) <sup>b</sup> | 16                | 16                       | 18%      | NO    | CANADA  | COMBINED     | 0,8  | 11,98 (4,08)        | 59,78 (12,86) | NO     | PSYCHOLOGIST  | CG(AI)                     | UNDEFINED                        |
| Gonyea, 2006 [48]        | Alzheimer       | (BI) <sup>b</sup>                         | 5                 | 5                        | 10%      | NO    | USA     | COMBINED     | 0,67 | NO                  | 64,4 (13,8)   | NO     | THERAPIST     | CG(AI)                     | UNDEFINED                        |
| Derotrou, 2010 [49]      | Alzheimer       | (BI) <sup>b</sup>                         | 12                | 12                       | 15%      | NO    | FRANCE  | COMBINED     | 0,68 | 11 (4)              | 65 (12)       | NO     | COMBINED      | WL(UC)                     | ALL                              |
| Pahlavanzadeh, 2011 [50] | Other dementias | (BI) <sup>b</sup>                         | 5                 | 5                        | NO       | NO    | IRAN    | COMBINED     | 0,76 | NO                  | 44,72 (14,79) | NO     | PSYCHIATRIST  | CG                         | UNDEFINED                        |
| Wang, 2011 [51]          | Other dementias | (CBI) <sup>b</sup>                        | 16                | 16                       | 0%       | YES   | CHINA   | COMBINED     | 0,65 | NO                  | 40,63 (8,21)  | NO     | NURSE         | CG                         | UNDEFINED                        |
| Canonici, 2012 [52]      | Alzheimer       | (BI) <sup>b</sup>                         | 24                | 24                       | 16%      | NO    | BRAZIL  | NO           | 0,93 | 9,8 (4)             | 54,2 (11,7)   | NO     | OTHER TRAINER | CG(UC)                     | UNDEFINED                        |
| Cheng, 2014 [54]         | Alzheimer       | (BI) <sup>b</sup>                         | 8                 | 8                        | 4%       | NO    | CHINA   | COMBINED     | 0,88 | NO                  | 54,02 (8,77)  | NO     | PSYCHOLOGIST  | CG(AI)                     | UNDEFINED                        |
| Cheng, 2016 [53]         | Alzheimer       | (BI) <sup>b</sup>                         | 8                 | 8                        | 2%       | NO    | CHINA   | COMBINED     | 0,86 | NO                  | 55,16 (10,92) | NO     | PSYCHOLOGIST  | CG(UC); CG(AI)             | UNDEFINED                        |
| Kor, 2019 [55]           | Other dementias | (BI) <sup>b</sup>                         | 10                | 10                       | 14%      | NO    | CHINA   | COMBINED     | 0,83 | NO                  | 57,1 (10,6)   | NO     | COMBINED      | CG(UC)                     | UNDEFINED                        |

Note. <sup>a</sup> Partial data. <sup>b</sup> Global data. <sup>c</sup> Control group without intervention (CG), Control group with alternative intervention (CG-AI), Control group with usual alternative intervention (CG-UC), Waiting list without intervention (WL), Waiting list with alternative intervention (WL-AI), Waiting list with usual alternative intervention (WL-UC). <sup>d</sup> At the end of the study, the control group may or may not receive the new intervention. (CBI)-Caregiver Burden Index; (BI)-Memory and Behavior Problem Checklist;(RMBPC)-Revised Memory and Behavior Problem Checklist;(MBPC)-The Memory and Behavior Problems Checklist;(CSS)-Caregiver Strain Scale;(ICS)-Impact of Caregiver Scale.

Supplementary Table S6. Individual therapy studies.

| Author                     | NCDs            | Scale                | Intervention time | Intervention end (weeks) | Drop out | Nurse     | Country | Relationship | Sex  | Education mean (SD) | Age (SD)      | Income | Trainer                | Control group <sup>c</sup> | Final control group <sup>d</sup> |
|----------------------------|-----------------|----------------------|-------------------|--------------------------|----------|-----------|---------|--------------|------|---------------------|---------------|--------|------------------------|----------------------------|----------------------------------|
| Quayhagen, 1989 [31]       | Alzheimer       | (BI) <sup>b</sup>    | 16                | 32                       | 20%      | NO        | USA     | NO           | 0,37 | 14,14 (3,6)         | 66,18 (7,02)  | NO     | THERAPIST              | CG                         | UNDEFINED                        |
| Teri, 1997 [32]            | Combined        | (BI) <sup>a</sup>    | 9                 | 9                        | 14%      | NO        | USA     | COMBINED     | 0,69 | 14,2 (2,7)          | 66,9 (11)     | NO     | THERAPIST              | WL; CG(UC)                 | UNDEFINED                        |
| Quayhagen, 2000 [33]       | Combined        | (BI) <sup>a</sup>    | 8                 | 12                       | NO       | YES       | USA     | SPOUSE       | 0,63 | 14,42 (0,3)         | 71,83 (0,8)   | NO     | COMBINED               | WL                         | SINGLE                           |
| Onor, 2007 [34]            | Alzheimer       | (CBI) <sup>b</sup>   | 16                | 16                       | 0%       | NO        | ITALY   | NO           | 0,62 | 8 (3,38)            | 59 (7,54)     | NO     | PSYCHIATRIST           | CG(UC)                     | UNDEFINED                        |
| Martin-Carrasco, 2009 [35] | Alzheimer       | (BI) <sup>b</sup>    | 16                | 40                       | 11%      | UNDEFINED | SPAIN   | COMBINED     | 0,68 | NO                  | 58,44 (13,9)  | NO     | COMBINED               | CG(UC)                     | UNDEFINED                        |
| Oken, 2010 [36]            | Other dementias | (RMBPC) <sup>a</sup> | 8                 | 8                        | 13%      | NO        | USA     | COMBINED     | 0,76 | NO                  | 64,9 (10,05)  | NO     | UNDEFINED              | CG(AI)                     | UNDEFINED                        |
| Hirano, 2011 [37]          | Other dementias | (BI) <sup>b</sup>    | 12                | 12                       | 14%      | NO        | JAPAN   | UNDEFINED    | 0,67 | NO                  | 73,7 (4,4)    | NO     | UNDEFINED              | CG                         | UNDEFINED                        |
| Kurz, 2012 [38]            | Alzheimer       | (BI) <sup>b</sup>    | 12                | 36                       | 15%      | NO        | GERMANY | COMBINED     | 0,70 | NO                  | 64,86 (13,21) | NO     | THERAPIST              | CG(UC)                     | UNDEFINED                        |
| Chen, 2014 [39]            | Other dementias | (CBI) <sup>b</sup>   | 12                | 12                       | NO       | YES       | CHINA   | COMBINED     | 0,67 | 9,24 (4,62)         | 54,94 (13,19) | NO     | NURSE                  | CG(UC)                     | UNDEFINED                        |
| Cuc, 2017 [40]             | Other dementias | (BI) <sup>b</sup>    | 1,42;6            | 24                       | 18%      | NO        | USA     | COMBINED     | 0,69 | 15,7 (2,6)          | 70,2 (12,5)   | NO     | UNDEFINED              | CG(AI)                     | UNDEFINED                        |
| Deoliveira, 2018 [41]      | Other dementias | (BI) <sup>b</sup>    | 24                | 24                       | NO       | NO        | BRAZIL  | COMBINED     | 0,76 | NO                  | 58,7 (15,4)   | NO     | THERAPIST OCCUPATIONAL | CG(UC)                     | UNDEFINED                        |
| Gokugur, 2018 [43]         | Other dementias | (BI) <sup>b</sup>    | 12                | 12                       | 14%      | YES       | TURKEY  | COMBINED     | 0,90 | NO                  | 52,52 (12,62) | NO     | NURSE                  | CG(AI)                     | UNDEFINED                        |
| Tang, 2018 [43]            | Other dementias | (BI) <sup>b</sup>    | 6                 | 12                       | 11%      | NO        | CHINA   | COMBINED     | 0,79 | 13 (4,2)            | 57,1 (11,2)   | NO     | THERAPIST OCCUPATIONAL | CG(UC)                     | UNDEFINED                        |

|                      |                        |              |   |    |    |    |       |          |          |    |                |    |           |        |              |
|----------------------|------------------------|--------------|---|----|----|----|-------|----------|----------|----|----------------|----|-----------|--------|--------------|
| Tapark,<br>2019 [44] | Other<br>dementia<br>s | (RMBPC)<br>a | 4 | 12 | NO | NO | CHINA | COMBINED | 0,8<br>6 | NO | 57,1<br>(11,1) | NO | UNDEFINED | CG(UC) | UNDEFIN<br>D |
|----------------------|------------------------|--------------|---|----|----|----|-------|----------|----------|----|----------------|----|-----------|--------|--------------|

Note. <sup>a</sup> Partial data. <sup>b</sup> Global data. <sup>c</sup> Control group without intervention (CG), Control group with alternative intervention (CG-AI), Control group with usual alternative intervention (CG-UC), Waiting list without intervention (WL), Waiting list with alternative intervention (WL-AI), Waiting list with usual alternative intervention (WL-UC). <sup>d</sup> At the end of the study, the control group may or may not receive the new intervention. (CBI)-Caregiver Burden Index; (BI)-Memory and Behavior Problem Checklist;(RMBPC)-Revised Memory and Behavior Problem Checklist;(MBPC)-The Memory and Behavior Problems Checklist;(CSS)-Caregiver Strain Scale;(ICS)-Impact of Caregiver Scale.

## Supplementary Table S7. Jadad scale quality studies.

| Studies                       | J1 | J2 | J3 | J4 | J5 | Scores<br>(Jadad) |
|-------------------------------|----|----|----|----|----|-------------------|
| <b>Group therapy</b>          |    |    |    |    |    |                   |
| Quayhangen, 2000 [33]         | 1  | 0  | 1  | 1  | 0  | 3                 |
| Canonici, 2012 [52]           | 1  | 0  | 0  | 0  | 1  | 2                 |
| Cheng, 2014 [54]              | 1  | 1  | 1  | 0  | 1  | 4                 |
| Cheng, 2016 [53]              | 1  | 1  | 1  | 1  | 1  | 5                 |
| Derotrou, 2010 [49]           | 1  | 1  | 0  | 0  | 1  | 3                 |
| Gonyea, 2006 [48]             | 1  | 1  | 0  | 0  | 1  | 3                 |
| Hebert, 2003 [47]             | 1  | 0  | 0  | 0  | 1  | 2                 |
| Kor, 2019 [55]                | 1  | 1  | 0  | 0  | 1  | 3                 |
| Pahlavanzadeh, 2011 [50]      | 1  | 0  | 0  | 0  | 0  | 1                 |
| Schiwiebert, 1994 [46]        | 1  | 0  | 0  | 0  | 1  | 2                 |
| Wang, 2011 [51]               | 1  | 1  | 0  | 0  | 1  | 3                 |
| Zarit, 1987 [45]              | 1  | 1  | 0  | 0  | 1  | 3                 |
| <b>Individual information</b> |    |    |    |    |    |                   |
| Dias, 2008 [29]               | 1  | 1  | 0  | 0  | 1  | 3                 |
| Gavrilova, 2009 [30]          | 1  | 1  | 0  | 0  | 1  | 3                 |
| McCurry, 2005 [28]            | 1  | 1  | 0  | 0  | 1  | 3                 |
| <b>Individual therapy</b>     |    |    |    |    |    |                   |



|                            |   |   |   |   |   |   |
|----------------------------|---|---|---|---|---|---|
| Quayhangen, 2000 [33]      | 1 | 0 | 1 | 1 | 0 | 3 |
| Chen, 2014 [39]            | 1 | 0 | 0 | 0 | 0 | 1 |
| Cuc, 2017 [40]             | 1 | 1 | 0 | 0 | 1 | 3 |
| Deoliveira, 2018 [41]      | 1 | 1 | 1 | 0 | 0 | 3 |
| Gokugur, 2018 [42]         | 1 | 1 | 0 | 0 | 1 | 3 |
| Hirano, 2011 [37]          | 1 | 0 | 0 | 0 | 1 | 2 |
| Kurz, 2012 [38]            | 1 | 0 | 0 | 0 | 1 | 2 |
| Martin-Carrasco, 2009 [35] | 1 | 1 | 0 | 0 | 1 | 3 |
| Oken, 2010 [36]            | 1 | 1 | 0 | 0 | 1 | 3 |
| Onor, 2007 [34]            | 1 | 0 | 0 | 0 | 1 | 2 |
| Quayhangen, 1989 [31]      | 1 | 0 | 0 | 0 | 1 | 2 |
| Tang, 2018 [43]            | 1 | 1 | 0 | 0 | 1 | 3 |
| Tapark, 2019 [44]          | 1 | 1 | 0 | 0 | 0 | 2 |
| Teri, 1997 [32]            | 1 | 0 | 0 | 0 | 1 | 2 |
| <b>Respite care</b>        |   |   |   |   |   |   |
| Baumgarten, 2002 [56]      | 1 | 1 | 0 | 0 | 1 | 3 |
| Mosello, 2008 [57]         | 1 | 0 | 0 | 0 | 1 | 2 |
| Quayhangen, 2000 [33]      | 1 | 0 | 1 | 1 | 0 | 3 |
| <b>Support group</b>       |   |   |   |   |   |   |
| Chien, 2008 [61]           | 1 | 0 | 0 | 0 | 1 | 2 |
| Hebert, 1994 [58]          | 1 | 1 | 0 | 0 | 1 | 3 |
| Logsdon, 2011 [62]         | 1 | 1 | 0 | 0 | 1 | 3 |
| Roth, 2005 [60]            | 1 | 1 | 0 | 0 | 1 | 3 |
| Yordi, 1994 [59]           | 1 | 0 | 0 | 0 | 1 | 2 |
| Zarit, 1987 [45]           | 1 | 1 | 0 | 0 | 1 | 3 |
| Teri, 1997 [32]            | 1 | 0 | 0 | 0 | 1 | 2 |

**Workshop**

|                               |   |   |   |   |   |   |
|-------------------------------|---|---|---|---|---|---|
| Ostwald, 1999 [63]            | 1 | 0 | 0 | 0 | 1 | 2 |
| Bourgeois, 2002 [20]          | 1 | 0 | 0 | 0 | 1 | 2 |
| Gallagher-thompson, 2000 [64] | 1 | 0 | 0 | 0 | 1 | 2 |

*Note. Higher score indicates higher quality.*

Supplementary Table S8. Delphi list quality studies.

| Studies                       | D1a | D1b | D2 | D3 | D4 | D5 | D7 | D6 | D8 | Scores<br>(Delphi list) |
|-------------------------------|-----|-----|----|----|----|----|----|----|----|-------------------------|
| <b>Group therapy</b>          |     |     |    |    |    |    |    |    |    |                         |
| Quayhangen, 2000 [33]         | 1   | 1   | 1  | 1  | 1  | 0  | 1  | 0  | 1  | 7                       |
| Canonici, 2012 [52]           | 1   | 0   | 1  | 1  | 0  | 0  | 1  | 0  | 1  | 5                       |
| Cheng, 2014 [54]              | 1   | 1   | 1  | 1  | 1  | 0  | 1  | 1  | 1  | 8                       |
| Cheng, 2016 [53]              | 1   | 1   | 1  | 1  | 0  | 0  | 1  | 1  | 1  | 7                       |
| Derotrou, 2010 [49]           | 1   | 1   | 1  | 1  | 0  | 0  | 1  | 1  | 1  | 7                       |
| Gonyea, 2006 [48]             | 1   | 0   | 1  | 1  | 0  | 0  | 1  | 0  | 1  | 5                       |
| Hebert, 2003 [47]             | 1   | 0   | 1  | 1  | 1  | 0  | 1  | 0  | 1  | 6                       |
| Kor, 2019 [55]                | 1   | 1   | 1  | 1  | 0  | 0  | 1  | 1  | 1  | 7                       |
| Pahlavanzadeh, 2011 [50]      | 1   | 0   | 1  | 1  | 0  | 0  | 1  | 0  | 1  | 5                       |
| Schiwiebert, 1994 [46]        | 1   | 1   | 1  | 1  | 0  | 0  | 1  | 0  | 1  | 6                       |
| Wang, 2011 [51]               | 1   | 1   | 1  | 1  | 1  | 0  | 1  | 0  | 1  | 7                       |
| Zarit, 1987 [45]              | 1   | 0   | 1  | 1  | 0  | 0  | 1  | 0  | 1  | 5                       |
| <b>Individual information</b> |     |     |    |    |    |    |    |    |    |                         |
| Dias, 2008 [29]               | 1   | 0   | 1  | 1  | 1  | 0  | 1  | 0  | 1  | 6                       |
| Gavrilova, 2009 [30]          | 1   | 0   | 1  | 1  | 1  | 0  | 1  | 1  | 1  | 7                       |
| McCurry, 2005 [28]            | 1   | 0   | 1  | 1  | 1  | 0  | 1  | 0  | 1  | 6                       |
| <b>Individual therapy</b>     |     |     |    |    |    |    |    |    |    |                         |
| Quayhangen, 2000 [33]         | 1   | 1   | 1  | 1  | 1  | 0  | 1  | 0  | 1  | 7                       |
| Chen, 2014 [39]               | 1   | 0   | 1  | 1  | 0  | 0  | 1  | 0  | 1  | 5                       |
| Cuc, 2017 [40]                | 1   | 0   | 1  | 1  | 0  | 0  | 1  | 0  | 1  | 5                       |
| Deoliveira, 2018 [41]         | 1   | 1   | 1  | 1  | 1  | 1  | 1  | 1  | 1  | 9                       |
| Gokugur, 2018 [42]            | 1   | 0   | 1  | 1  | 0  | 0  | 1  | 1  | 1  | 6                       |

|                               |   |   |   |   |   |   |   |   |   |   |
|-------------------------------|---|---|---|---|---|---|---|---|---|---|
| Hirano, 2011 [37]             | 1 | 0 | 1 | 1 | 0 | 0 | 1 | 0 | 1 | 5 |
| Kurz, 2012 [38]               | 1 | 1 | 1 | 1 | 1 | 0 | 1 | 0 | 1 | 7 |
| Martin-Carrasco, 2009 [35]    | 1 | 0 | 1 | 1 | 0 | 0 | 1 | 0 | 1 | 5 |
| Oken, 2010 [36]               | 1 | 1 | 1 | 1 | 1 | 0 | 1 | 0 | 1 | 7 |
| Onor, 2007 [34]               | 1 | 0 | 1 | 1 | 0 | 0 | 0 | 0 | 1 | 4 |
| Quayhangen, 1989 [31]         | 1 | 0 | 1 | 1 | 0 | 0 | 1 | 0 | 1 | 5 |
| Tang, 2018 [43]               | 1 | 0 | 1 | 1 | 0 | 0 | 1 | 0 | 1 | 5 |
| Tapark, 2019 [44]             | 1 | 0 | 1 | 1 | 0 | 0 | 1 | 0 | 1 | 5 |
| Teri, 1997 [32]               | 1 | 1 | 1 | 1 | 1 | 0 | 1 | 0 | 1 | 7 |
| <b>Respite care</b>           |   |   |   |   |   |   |   |   |   |   |
| Baumgarten, 2002 [56]         | 1 | 0 | 1 | 1 | 0 | 0 | 1 | 0 | 1 | 5 |
| Mosello, 2008 [57]            | 1 | 0 | 1 | 1 | 0 | 0 | 1 | 0 | 1 | 5 |
| Quayhangen, 2000 [33]         | 1 | 1 | 1 | 1 | 1 | 0 | 1 | 0 | 1 | 7 |
| <b>Support group</b>          |   |   |   |   |   |   |   |   |   |   |
| Chien, 2008 [61]              | 1 | 0 | 1 | 1 | 1 | 0 | 0 | 0 | 1 | 5 |
| Hebert, 1994 [58]             | 1 | 1 | 1 | 1 | 0 | 0 | 1 | 1 | 1 | 7 |
| Logsdon, 2011 [62]            | 1 | 0 | 1 | 1 | 0 | 0 | 1 | 0 | 1 | 5 |
| Roth, 2005 [60]               | 1 | 0 | 1 | 1 | 0 | 0 | 1 | 0 | 1 | 5 |
| Yordi, 1994 [59]              | 1 | 0 | 1 | 1 | 0 | 0 | 1 | 0 | 1 | 5 |
| Zarit, 1987 [45]              | 1 | 0 | 1 | 1 | 0 | 0 | 1 | 0 | 1 | 5 |
| Teri, 1997 [32]               | 1 | 1 | 1 | 1 | 1 | 0 | 1 | 0 | 1 | 7 |
| <b>Workshop</b>               |   |   |   |   |   |   |   |   |   |   |
| Ostwald, 1999 [63]            | 1 | 0 | 1 | 1 | 0 | 0 | 1 | 0 | 1 | 5 |
| Bourgeois, 2002 [20]          | 1 | 0 | 1 | 1 | 0 | 1 | 1 | 0 | 1 | 6 |
| Gallagher-thompson, 2000 [64] | 1 | 1 | 1 | 1 | 1 | 0 | 1 | 0 | 1 | 7 |

*Note. Higher score indicates higher quality.*

Supplementary Table S9. Forbes scale quality studies.

| Studies                       | F1 | F2 | F3 | F4 | F5 | Scores<br>(Forbes) |
|-------------------------------|----|----|----|----|----|--------------------|
| <b>Group therapy</b>          |    |    |    |    |    |                    |
| Quayhangen, 2000 [33]         | 1  | 1  | 1  | 0  | 0  | 3                  |
| Canonici, 2012 [52]           | 1  | 1  | 1  | 0  | 1  | 4                  |
| Cheng, 2014 [54]              | 1  | 1  | 1  | 1  | 0  | 4                  |
| Cheng, 2016 [53]              | 1  | 1  | 1  | 1  | 0  | 4                  |
| Derotrou, 2010 [49]           | 1  | 1  | 1  | 0  | 1  | 4                  |
| Gonyea, 2006 [48]             | 0  | 1  | 1  | 1  | 0  | 3                  |
| Hebert, 2003 [47]             | 1  | 1  | 1  | 0  | 0  | 3                  |
| Kor, 2019 [55]                | 1  | 1  | 1  | 0  | 1  | 4                  |
| Pahlavanzadeh, 2011 [50]      | 1  | 1  | 1  | 0  | 0  | 3                  |
| Schiwiebert, 1994 [46]        | 1  | 1  | 1  | 0  | 0  | 3                  |
| Wang, 2011 [51]               | 1  | 1  | 1  | 1  | 0  | 4                  |
| Zarit, 1987 [45]              | 1  | 1  | 1  | 0  | 0  | 3                  |
| <b>Individual information</b> |    |    |    |    |    |                    |
| Dias, 2008 [29]               | 1  | 1  | 1  | 0  | 0  | 3                  |
| Gavrilova, 2009 [30]          | 1  | 1  | 1  | 0  | 0  | 3                  |
| McCurry, 2005 [28]            | 1  | 1  | 1  | 0  | 0  | 3                  |
| <b>Individual therapy</b>     |    |    |    |    |    |                    |
| Quayhangen, 2000 [33]         | 1  | 1  | 1  | 0  | 0  | 3                  |
| Chen, 2014 [39]               | 1  | 1  | 1  | 0  | 1  | 4                  |
| Cuc, 2017 [40]                | 1  | 1  | 1  | 0  | 0  | 3                  |
| Deoliveira, 2018 [41]         | 1  | 1  | 1  | 0  | 0  | 3                  |
| Gokugur, 2018 [42]            | 1  | 1  | 1  | 0  | 0  | 3                  |

|                               |   |   |   |   |   |   |
|-------------------------------|---|---|---|---|---|---|
| Hirano, 2011 [37]             | 1 | 1 | 1 | 0 | 0 | 3 |
| Kurz, 2012 [38]               | 1 | 1 | 1 | 0 | 0 | 3 |
| Martin-Carrasco, 2009 [35]    | 1 | 1 | 1 | 0 | 0 | 3 |
| Oken, 2010 [36]               | 1 | 1 | 1 | 0 | 0 | 3 |
| Onor, 2007 [34]               | 1 | 1 | 1 | 1 | 1 | 5 |
| Quayhangen, 1989 [31]         | 1 | 1 | 1 | 0 | 0 | 3 |
| Tang, 2018 [43]               | 1 | 1 | 1 | 0 | 1 | 4 |
| Tapark, 2019 [44]             | 1 | 1 | 1 | 0 | 0 | 3 |
| Teri, 1997 [32]               | 1 | 1 | 1 | 0 | 0 | 3 |
| <b>Respite care</b>           |   |   |   |   |   |   |
| Baumgarten, 2002 [56]         | 1 | 1 | 1 | 0 | 0 | 3 |
| Mosello, 2008 [57]            | 1 | 1 | 1 | 1 | 1 | 5 |
| Quayhangen, 2000 [33]         | 1 | 1 | 1 | 0 | 0 | 3 |
| <b>Support group</b>          |   |   |   |   |   |   |
| Chien, 2008 [61]              | 1 | 1 | 1 | 1 | 1 | 5 |
| Hebert, 1994 [58]             | 1 | 1 | 1 | 0 | 0 | 3 |
| Logsdon, 2011 [62]            | 1 | 1 | 1 | 1 | 0 | 4 |
| Roth, 2005 [60]               | 1 | 1 | 1 | 0 | 0 | 3 |
| Yordi, 1994 [59]              | 1 | 1 | 1 | 0 | 0 | 3 |
| Zarit, 1987 [45]              | 1 | 1 | 1 | 0 | 0 | 3 |
| Teri, 1997 [32]               | 1 | 1 | 1 | 0 | 0 | 3 |
| <b>Workshop</b>               |   |   |   |   |   |   |
| Ostwald, 1999 [63]            | 1 | 1 | 1 | 0 | 0 | 3 |
| Bourgeois, 2002 [20]          | 1 | 1 | 1 | 0 | 0 | 3 |
| Gallagher-thompson, 2000 [64] | 1 | 1 | 1 | 0 | 0 | 3 |

*Note. Higher score indicates higher quality.*

Supplementary Table S10. Risk of bias (ROB) 2.0

| Study ID                 | D1 - Randomisation process | D2 - Deviations from the intended interventions | D3 - Missing outcome data | D4 - Measurement of the outcome | D5 - Selection of the reported results | Overall |
|--------------------------|----------------------------|-------------------------------------------------|---------------------------|---------------------------------|----------------------------------------|---------|
| Group therapy            |                            |                                                 |                           |                                 |                                        |         |
| Canonici, 2012 [52]      | +                          | !                                               | !                         | +                               | +                                      | !       |
| Cheng, 2014 [54]         | +                          | !                                               | +                         | +                               | +                                      | !       |
| Cheng, 2016 [53]         | +                          | !                                               | +                         | +                               | +                                      | !       |
| Derotrou, 2010 [49]      | +                          | !                                               | !                         | +                               | +                                      | !       |
| Gonyea, 2006 [48]        | +                          | +                                               | +                         | +                               | +                                      | !       |
| Hebert, 2003 [47]        | +                          | !                                               | !                         | +                               | +                                      | !       |
| Kor, 2019 [55]           | +                          | !                                               | !                         | +                               | +                                      | !       |
| Pahlavanzadeh, 2011 [50] | +                          | !                                               | -                         | +                               | +                                      | -       |

Low risk  
 Some concerns  
 High risk

|                        |   |   |   |   |   |   |
|------------------------|---|---|---|---|---|---|
| Schiwiebert, 1994 [46] | + | + | ! | + | + | ! |
| Wang, 2011 [51]        | + | ! | + | + | + | ! |
| Zarit, 1987 [45]       | + | + | ! | + | + | ! |
| Quayhangen, 2000 [33]  | + | ! | - | + | + | - |
| Individual information |   |   |   |   |   |   |
| Dias, 2008 [29]        | + | ! | ! | + | + | ! |
| Gavrilova, 2009 [30]   | + | ! | ! | + | + | ! |
| McCurry, 2005 [28]     | + | ! | ! | + | + | ! |
| Individual therapy     |   |   |   |   |   |   |
| Quayhangen, 2000 [33]  | + | ! | - | + | + | - |
| Chen, 2014 [39]        | + | ! | - | + | + | - |
| Cuc, 2017 [40]         | + | ! | ! | + | + | ! |
| Deoliveira, 2018 [41]  | + | + | - | + | + | - |
| Gokugur, 2018 [42]     | + | ! | ! | + | + | ! |
| Hirano, 2011 [37]      | + | ! | ! | + | + | ! |
| Kurz, 2012 [38]        | + | ! | ! | + | + | ! |



|                            |   |   |   |   |   |   |
|----------------------------|---|---|---|---|---|---|
| Martin-Carrasco, 2009 [35] | + | ! | ! | + | + | ! |
| Oken, 2010 [36]            | + | ! | ! | + | + | ! |
| Onor, 2007 [34]            | + | ! | + | - | + | - |
| Quayhangen, 1989 [31]      | + | + | ! | + | + | ! |
| Tang, 2018 [43]            | + | ! | ! | + | + | ! |
| Tapark, 2019 [44]          | + | + | - | + | + | - |
| Teri, 1997 [32]            | + | ! | ! | + | + | ! |
| <b>Respite care</b>        |   |   |   |   |   |   |
| Baumgarten, 2002 [56]      | + | ! | ! | + | + | ! |
| Mosello, 2008 [57]         | + | ! | + | + | + | ! |
| Quayhangen, 2000 [33]      | + | ! | - | + | + | - |
| <b>Support group</b>       |   |   |   |   |   |   |
| Teri, 1997 [32]            | + | ! | ! | + | + | ! |
| Chien, 2008 [61]           | + | ! | + | - | + | - |
| Hebert, 1994 [58]          | + | ! | ! | + | + | ! |
| Logsdon, 2011 [62]         | + | ! | + | + | + | ! |

|                               |  |  |  |  |  |  |
|-------------------------------|--|--|--|--|--|--|
| Roth, 2005 [60]               |  |  |  |  |  |  |
| Yordi, 1994 [59]              |  |  |  |  |  |  |
| Zarit, 1987 [45]              |  |  |  |  |  |  |
| Workshop                      |  |  |  |  |  |  |
| Ostwald, 1999 [63]            |  |  |  |  |  |  |
| Bourgeois, 2002 [20]          |  |  |  |  |  |  |
| Gallagher-thompson, 2000 [64] |  |  |  |  |  |  |

Supplementary Table S11. The PRISMA Checklist.

| Section and Topic       | Item # | Checklist item                                                                                                                                                                                                                                                                                       | Location where item is reported |
|-------------------------|--------|------------------------------------------------------------------------------------------------------------------------------------------------------------------------------------------------------------------------------------------------------------------------------------------------------|---------------------------------|
| <b>TITLE</b>            |        |                                                                                                                                                                                                                                                                                                      |                                 |
| Title                   | 1      | Identify the report as a systematic review.                                                                                                                                                                                                                                                          | Page 1                          |
| <b>ABSTRACT</b>         |        |                                                                                                                                                                                                                                                                                                      |                                 |
| Abstract                | 2      | See the PRISMA 2020 for Abstracts checklist.                                                                                                                                                                                                                                                         | Page 2                          |
| <b>INTRODUCTION</b>     |        |                                                                                                                                                                                                                                                                                                      |                                 |
| Rationale               | 3      | Describe the rationale for the review in the context of existing knowledge.                                                                                                                                                                                                                          | Page 3                          |
| Objectives              | 4      | Provide an explicit statement of the objective(s) or question(s) the review addresses.                                                                                                                                                                                                               | Page 3                          |
| <b>METHODS</b>          |        |                                                                                                                                                                                                                                                                                                      |                                 |
| Eligibility criteria    | 5      | Specify the inclusion and exclusion criteria for the review and how studies were grouped for the syntheses.                                                                                                                                                                                          | Page 3                          |
| Information sources     | 6      | Specify all databases, registers, websites, organisations, reference lists and other sources searched or consulted to identify studies. Specify the date when each source was last searched or consulted.                                                                                            | Page 3                          |
| Search strategy         | 7      | Present the full search strategies for all databases, registers and websites, including any filters and limits used.                                                                                                                                                                                 | Page 3                          |
| Selection process       | 8      | Specify the methods used to decide whether a study met the inclusion criteria of the review, including how many reviewers screened each record and each report retrieved, whether they worked independently, and if applicable, details of automation tools used in the process.                     | Page 3                          |
| Data collection process | 9      | Specify the methods used to collect data from reports, including how many reviewers collected data from each report, whether they worked independently, any processes for obtaining or confirming data from study investigators, and if applicable, details of automation tools used in the process. | Page 3                          |
| Data items              | 10a    | List and define all outcomes for which data were sought. Specify whether all results that were compatible with each                                                                                                                                                                                  | Page 3-4                        |

| Section and Topic             | Item # | Checklist item                                                                                                                                                                                                                                                    | Location where item is reported |
|-------------------------------|--------|-------------------------------------------------------------------------------------------------------------------------------------------------------------------------------------------------------------------------------------------------------------------|---------------------------------|
|                               |        | outcome domain in each study were sought (e.g. for all measures, time points, analyses), and if not, the methods used to decide which results to collect.                                                                                                         |                                 |
|                               | 10b    | List and define all other variables for which data were sought (e.g. participant and intervention characteristics, funding sources). Describe any assumptions made about any missing or unclear information.                                                      | Page 3-4                        |
| Study risk of bias assessment | 11     | Specify the methods used to assess risk of bias in the included studies, including details of the tool(s) used, how many reviewers assessed each study and whether they worked independently, and if applicable, details of automation tools used in the process. | Page 3-4                        |
| Effect measures               | 12     | Specify for each outcome the effect measure(s) (e.g. risk ratio, mean difference) used in the synthesis or presentation of results.                                                                                                                               | Page 4                          |
| Synthesis methods             | 13a    | Describe the processes used to decide which studies were eligible for each synthesis (e.g. tabulating the study intervention characteristics and comparing against the planned groups for each synthesis (item #5)).                                              | Page 4                          |
|                               | 13b    | Describe any methods required to prepare the data for presentation or synthesis, such as handling of missing summary statistics, or data conversions.                                                                                                             | Page 4                          |
|                               | 13c    | Describe any methods used to tabulate or visually display results of individual studies and syntheses.                                                                                                                                                            |                                 |
|                               | 13d    | Describe any methods used to synthesize results and provide a rationale for the choice(s). If meta-analysis was performed, describe the model(s), method(s) to identify the presence and extent of statistical heterogeneity, and software package(s) used.       | Page 4                          |
|                               | 13e    | Describe any methods used to explore possible causes of heterogeneity among study results (e.g. subgroup analysis, meta-regression).                                                                                                                              | Page 4                          |
|                               | 13f    | Describe any sensitivity analyses conducted to assess robustness of the synthesized results.                                                                                                                                                                      | Page 4                          |

| Section and Topic             | Item # | Checklist item                                                                                                                                                                                                                                                                       | Location where item is reported |
|-------------------------------|--------|--------------------------------------------------------------------------------------------------------------------------------------------------------------------------------------------------------------------------------------------------------------------------------------|---------------------------------|
| Reporting bias assessment     | 14     | Describe any methods used to assess risk of bias due to missing results in a synthesis (arising from reporting biases).                                                                                                                                                              | Page 4                          |
| Certainty assessment          | 15     | Describe any methods used to assess certainty (or confidence) in the body of evidence for an outcome.                                                                                                                                                                                | Page 4                          |
| <b>RESULTS</b>                |        |                                                                                                                                                                                                                                                                                      |                                 |
| Study selection               | 16a    | Describe the results of the search and selection process, from the number of records identified in the search to the number of studies included in the review, ideally using a flow diagram.                                                                                         | Page 5                          |
|                               | 16b    | Cite studies that might appear to meet the inclusion criteria, but which were excluded, and explain why they were excluded.                                                                                                                                                          | Page 5                          |
| Study characteristics         | 17     | Cite each included study and present its characteristics.                                                                                                                                                                                                                            | Page 5                          |
| Risk of bias in studies       | 18     | Present assessments of risk of bias for each included study.                                                                                                                                                                                                                         |                                 |
| Results of individual studies | 19     | For all outcomes, present, for each study: (a) summary statistics for each group (where appropriate) and (b) an effect estimate and its precision (e.g. confidence/credible interval), ideally using structured tables or plots.                                                     | Page 5                          |
| Results of syntheses          | 20a    | For each synthesis, briefly summarise the characteristics and risk of bias among contributing studies.                                                                                                                                                                               | Page 5-6                        |
|                               | 20b    | Present results of all statistical syntheses conducted. If meta-analysis was done, present for each the summary estimate and its precision (e.g. confidence/credible interval) and measures of statistical heterogeneity. If comparing groups, describe the direction of the effect. | Page 5-6                        |
|                               | 20c    | Present results of all investigations of possible causes of heterogeneity among study results.                                                                                                                                                                                       | Page 5-6                        |
|                               | 20d    | Present results of all sensitivity analyses conducted to assess the robustness of the synthesized results.                                                                                                                                                                           | Page 5-6                        |
| Reporting biases              | 21     | Present assessments of risk of bias due to missing results (arising from reporting biases) for each synthesis assessed.                                                                                                                                                              | Page 7                          |

| Section and Topic                              | Item # | Checklist item                                                                                                                                                                                                                             | Location where item is reported |
|------------------------------------------------|--------|--------------------------------------------------------------------------------------------------------------------------------------------------------------------------------------------------------------------------------------------|---------------------------------|
| Certainty of evidence                          | 22     | Present assessments of certainty (or confidence) in the body of evidence for each outcome assessed.                                                                                                                                        | Page 7                          |
| <b>DISCUSSION</b>                              |        |                                                                                                                                                                                                                                            |                                 |
| Discussion                                     | 23a    | Provide a general interpretation of the results in the context of other evidence.                                                                                                                                                          | Page 7-9                        |
|                                                | 23b    | Discuss any limitations of the evidence included in the review.                                                                                                                                                                            | Page 9                          |
|                                                | 23c    | Discuss any limitations of the review processes used.                                                                                                                                                                                      | Page 9                          |
|                                                | 23d    | Discuss implications of the results for practice, policy, and future research.                                                                                                                                                             | Page 9                          |
| <b>OTHER INFORMATION</b>                       |        |                                                                                                                                                                                                                                            |                                 |
| Registration and protocol                      | 24a    | Provide registration information for the review, including register name and registration number, or state that the review was not registered.                                                                                             | Page 2                          |
|                                                | 24b    | Indicate where the review protocol can be accessed, or state that a protocol was not prepared.                                                                                                                                             | Page 2                          |
|                                                | 24c    | Describe and explain any amendments to information provided at registration or in the protocol.                                                                                                                                            | Page 2                          |
| Support                                        | 25     | Describe sources of financial or non-financial support for the review, and the role of the funders or sponsors in the review.                                                                                                              | Page 10                         |
| Competing interests                            | 26     | Declare any competing interests of review authors.                                                                                                                                                                                         | Page 10                         |
| Availability of data, code and other materials | 27     | Report which of the following are publicly available and where they can be found: template data collection forms; data extracted from included studies; data used for all analyses; analytic code; any other materials used in the review. | Page 2                          |

From: Page MJ, McKenzie JE, Bossuyt PM, Boutron I, Hoffmann TC, Mulrow CD, Shamseer L, Tetzlaff JM, Akl EA, Brennan SE, Chou R, Glanville J, Grimshaw JM, Hróbjartsson A, Lalu MM, Li T, Loder EW, Mayo-Wilson E, McDonald S, McGuinness LA, Stewart LA, Thomas J, Tricco AC, Welch VA, Whiting P, Moher D. The PRISMA 2020 statement: an updated guideline for reporting systematic reviews. *Rev Esp Cardiol (Engl Ed)*. 2021 Sep;74(9):790-799. English, Spanish. doi: 10.1016/j.rec.2021.07.010. Erratum in: *Rev Esp Cardiol (Engl Ed)*. 2022 Feb;75(2):192. PMID: 34446261.

Supplementary Figure S1. Heterogeneity evolution when excluding articles.

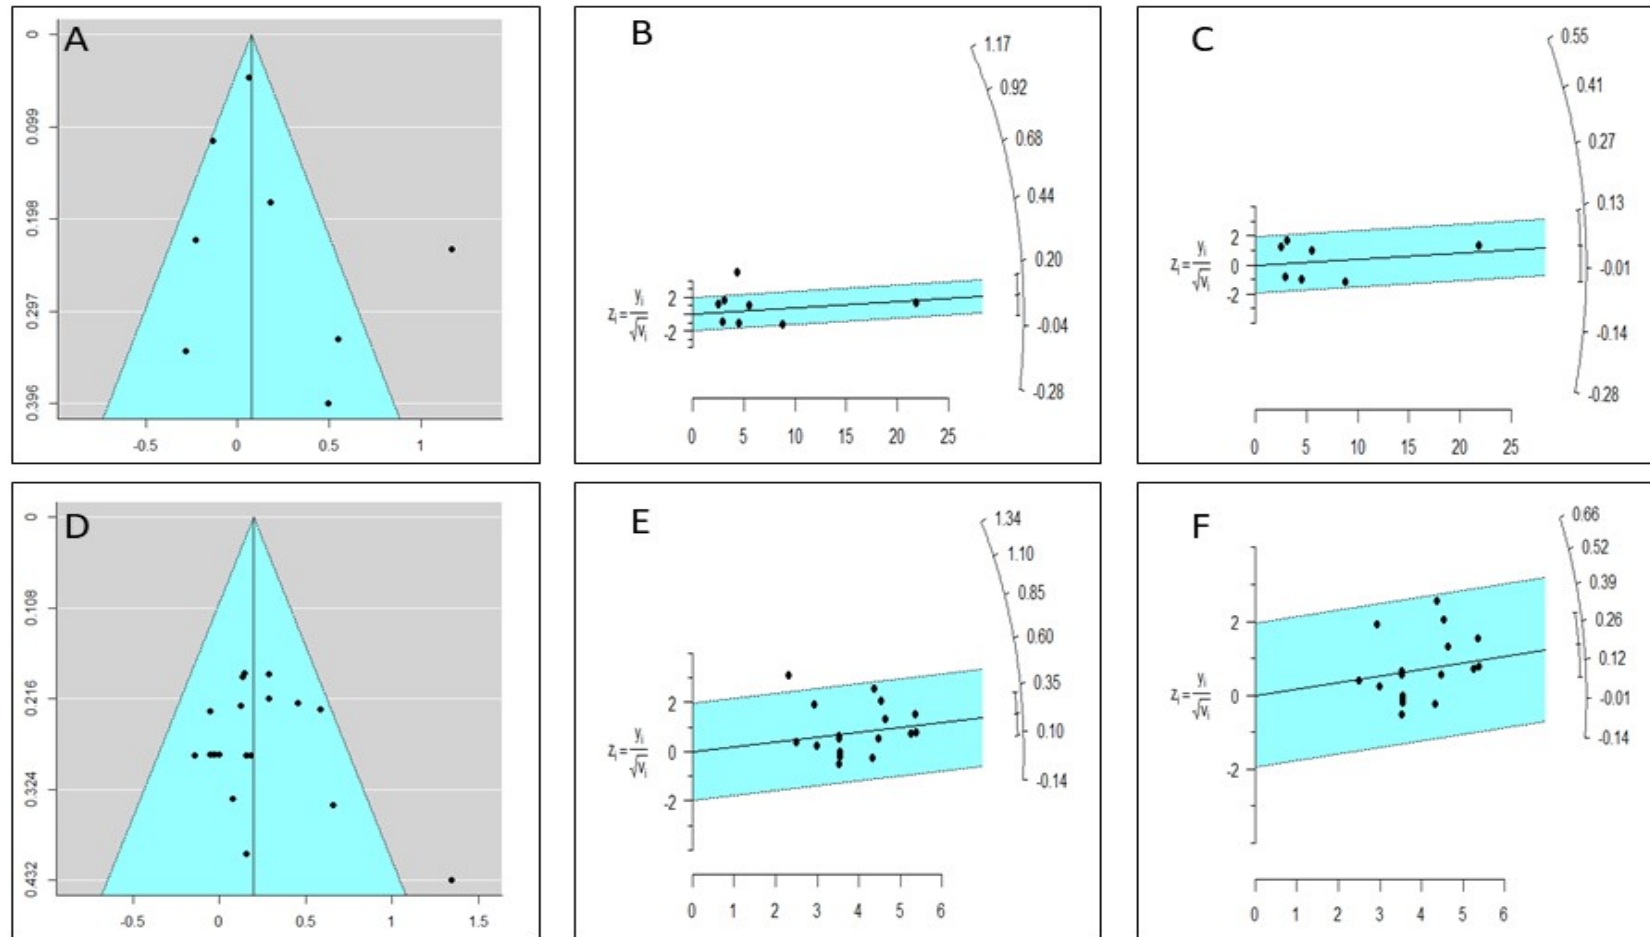

Note. Support group - A) Funnel plot; B) Galbraith plot; C) Galbraith plot without Chien et al. (2008). Group therapy - D) Funnel plot; E) Galbraith plot; F) Galbraith plot without Canonici et al. (2012).

Supplementary Figure S2. Heterogeneity evolution when excluding articles.

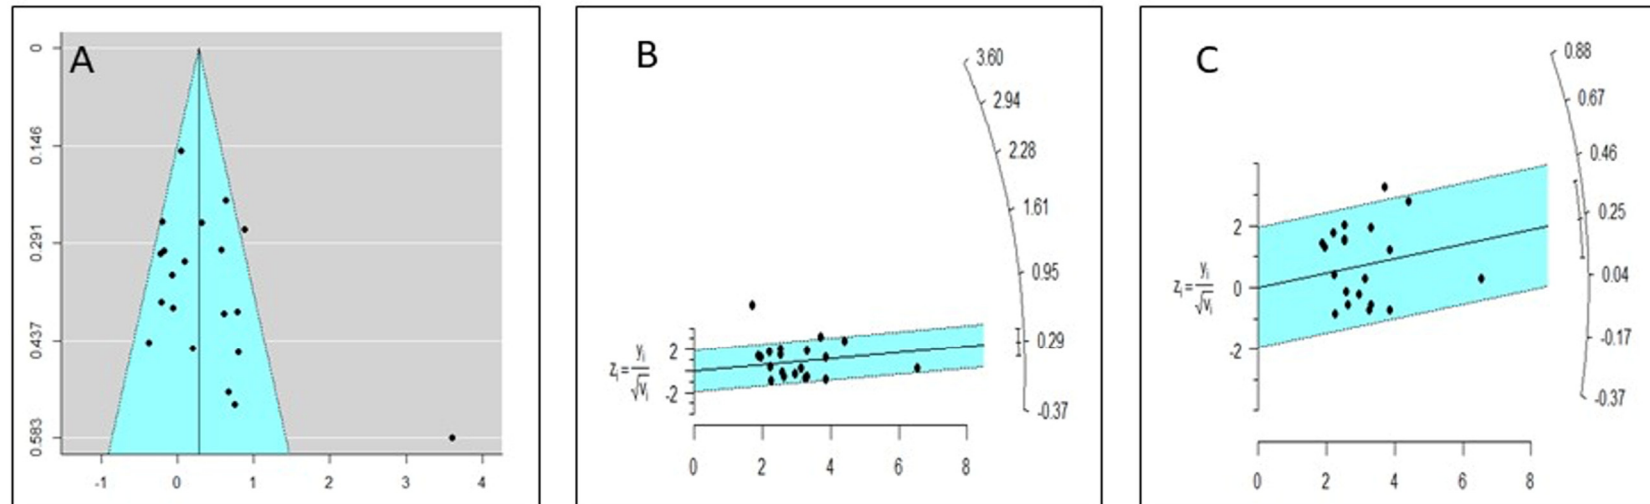

Note. Individual therapy - A) Funnel plot; B) Galbraith plot; C) Galbraith plot without Hirano et al. (2011).
